# Supplementary material for: Deep proteomic network analysis of Alzheimer’s disease brain reveals alterations in RNA binding proteins and RNA splicing associated with disease
Source: Springer Nature journal article supplement (doi:10.1186/s13024-018-0282-4), 2018-10-04
Supplement: MOESM3 [file 16173264]

**Batch 1**

| Case# | Case Type | TMT10- |
|-------|-----------|--------|
|       | BLSA GIS  | 126    |
| 1407  | AD        | 127N   |
| 1430  | AD        | 127C   |
| 1273  | MCI       | 128N   |
| 1341  | MCI       | 128C   |
| 0803  | AsymAD    | 129N   |
| 2342  | AsymAD    | 129C   |
| 0827  | CONTROL   | 130N   |
| 1036  | CONTROL   | 130C   |
|       | EMORY GIS | 131    |

**Batch 2**

| Case# | Case Type | TMT10- |
|-------|-----------|--------|
|       | BLSA GIS  | 126    |
| 1649  | AD        | 127N   |
| 1712  | AD        | 127C   |
| 1372  | MCI       | 128N   |
| 1543  | MCI       | 128C   |
| 1479  | AsymAD    | 129N   |
| 1591  | AsymAD    | 129C   |
| 1312  | CONTROL   | 130N   |
| 1313  | CONTROL   | 130C   |
|       | EMORY GIS | 131    |

**Batch 3**

| Case# | Case Type | TMT10- |
|-------|-----------|--------|
|       | BLSA GIS  | 126    |
| 1735  | AD        | 127N   |
| 1839  | AD        | 127C   |
| 1875  | AD        | 128N   |
| 1548  | MCI       | 128C   |
| 1720  | AsymAD    | 129N   |
| 1734  | AsymAD    | 129C   |
| 1471  | CONTROL   | 130N   |
| 1517  | CONTROL   | 130C   |
|       | EMORY GIS | 131    |

**Batch 4**

| Case# | Case Type | TMT10- |
|-------|-----------|--------|
|       | BLSA GIS  | 126    |
| 1973  | AD        | 127N   |
| 1984  | AD        | 127C   |
| 1603  | MCI       | 128N   |
| 1669  | MCI       | 128C   |
| 1843  | AsymAD    | 129N   |
| 1867  | AsymAD    | 129C   |
| 1672  | CONTROL   | 130N   |
| 2020  | CONTROL   | 130C   |
|       | EMORY GIS | 131    |

**Batch 5**

| Case# | Case Type | TMT10- |
|-------|-----------|--------|
|       | BLSA      | 126    |
| 2004  | AD        | 127N   |
| 2023  | AD        | 127C   |
| 2028  | AD        | 128N   |
| 1790  | MCI       | 128C   |
| 1924  | AsymAD    | 129N   |
| 2011  | AsymAD    | 129C   |
| 2021  | CONTROL   | 130N   |
| 2027  | CONTROL   | 130C   |
|       | EMORY GIS | 131    |

**Batch 6**

| Case# | Case Type | TMT10- |
|-------|-----------|--------|
|       | BLSA GIS  | 126    |
| 2032  | AD        | 128N   |
| 2157  | AD        | 128C   |
| 1805  | MCI       | 130N   |
| 1969  | MCI       | 130C   |
| 2037  | AsymAD    | 129N   |
| 2069  | AsymAD    | 129C   |
| 2066  | CONTROL   | 127N   |
| 2151  | CONTROL   | 127C   |
|       | EMORY GIS | 131    |

**Batch 7**

| Case# | Case Type | TMT10- |
|-------|-----------|--------|
|       | BLSA GIS  | 126    |
| 2184  | AD        | 127N   |
| 2226  | AD        | 127C   |
| 2274  | AD        | 128N   |
| 2000  | MCI       | 128C   |
| 2190  | AsymAD    | 129N   |
| 2316  | AsymAD    | 129C   |
| 2228  | CONTROL   | 130N   |
| 2317  | CONTROL   | 130C   |
|       | EMORY GIS | 131    |

**Batch 8**

| Case# | Case Type | TMT10- |
|-------|-----------|--------|
|       | BLSA GIS  | 126    |
|       | BLSA GIS  | 127N   |
| 1284  | AD        | 127C   |
| 1556  | AD        | 128N   |
| 1921  | AD        | 128C   |
| 0827  | CONTROL   | 129N   |
| 1672  | CONTROL   | 129C   |
| 2317  | CONTROL   | 130N   |
|       | EMORY GIS | 130C   |
|       | EMORY GIS | 131    |

Precuneus, not DLPFC

2 x 2 DLPFC technical replicates
