# Supplementary material for: Deep proteomic network analysis of Alzheimer’s disease brain reveals alterations in RNA binding proteins and RNA splicing associated with disease
Source: Springer Nature journal article supplement (doi:10.1186/s13024-018-0282-4), 2018-10-04

CT  
1036 1312 1313 1471 1517 1672 2020 2021 2027 2066 2151 2228

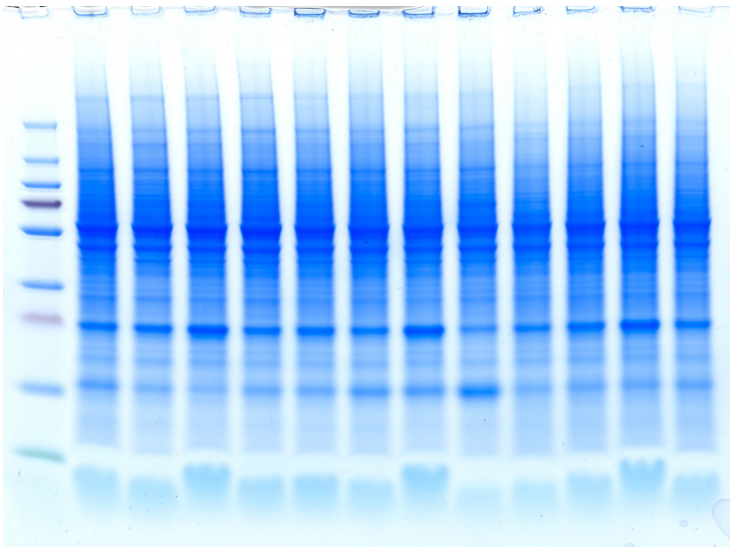

CT AD  
2317 1284 1407 1430 1556 1649 1712 1735 1839 1875 1921 1973

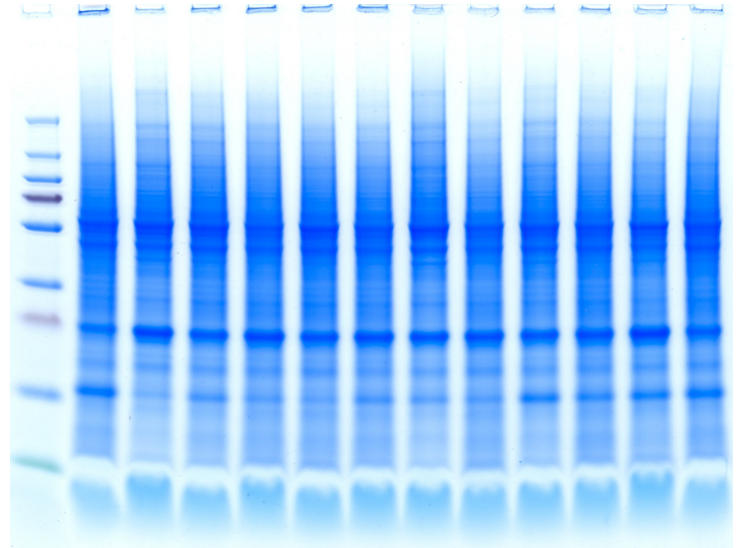

AD AD AD AD AD AD AD AD AD AS AS AS  
1984 2004 2023 2028 2032 2157 2184 2226 2274 0803 1479 1591

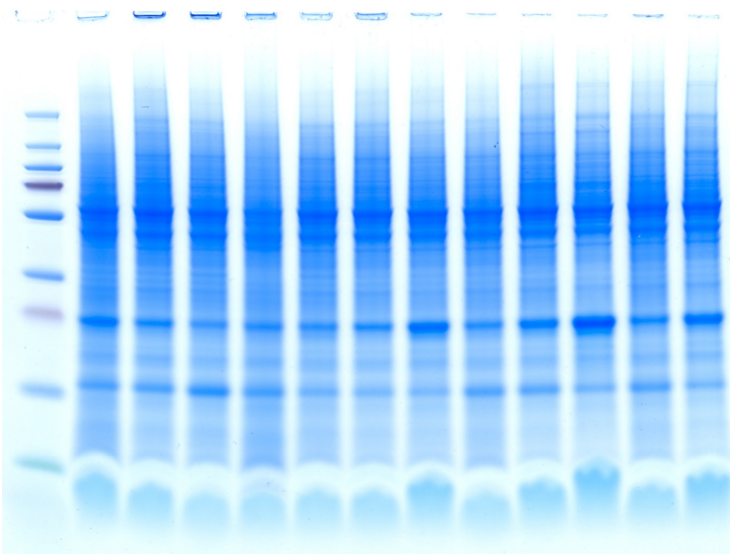

AS  
1720 1734 1843 1867 1924 2011 2037 2069 2190 2316 2342

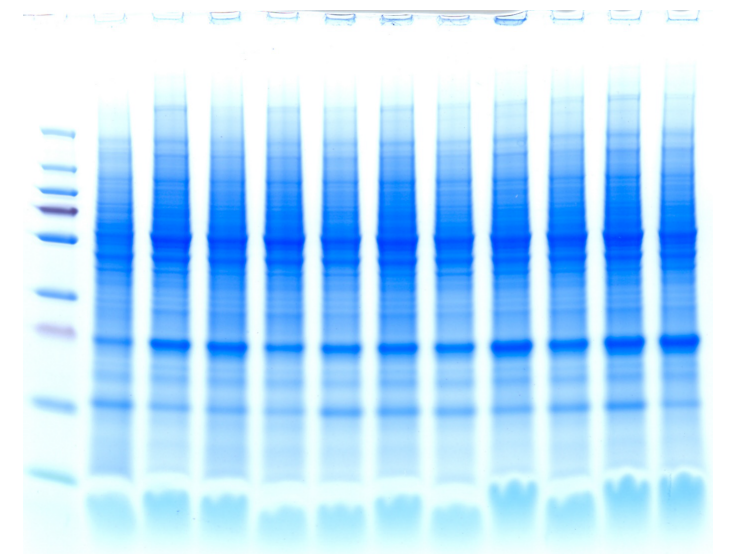

MCI  
1273 1341 1372 1543 1548 1603 1669 1790 1805 1969 2000

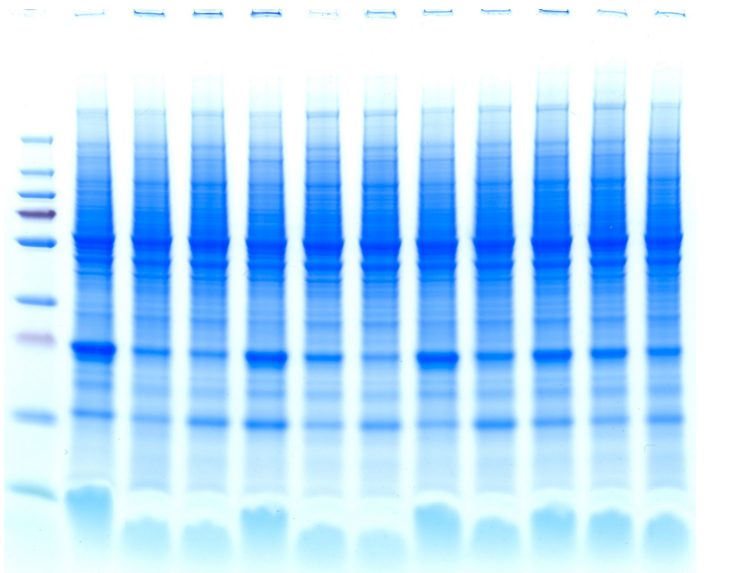

Supplement: MOESM8 [file 16173264]
