# Supplementary material for: Deep proteomic network analysis of Alzheimer’s disease brain reveals alterations in RNA binding proteins and RNA splicing associated with disease
Source: Springer Nature journal article supplement (doi:10.1186/s13024-018-0282-4), 2018-10-04

# A Astrocyte and Microglia Enriched

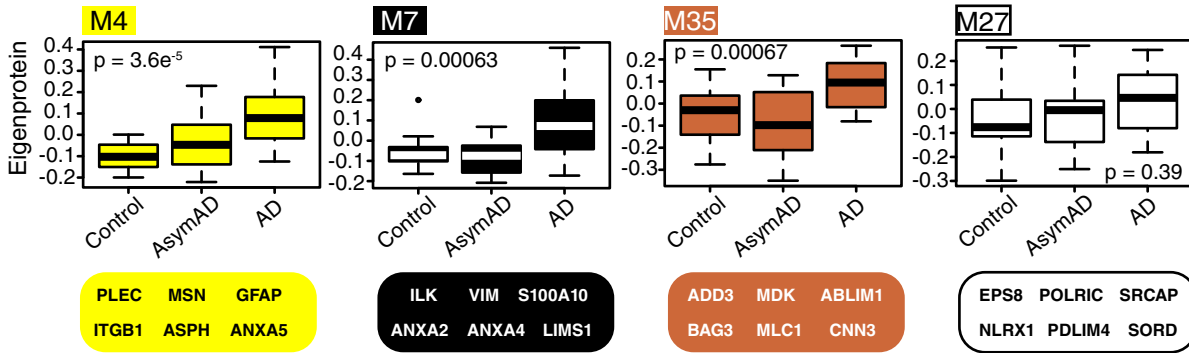

# B Neuron Enriched

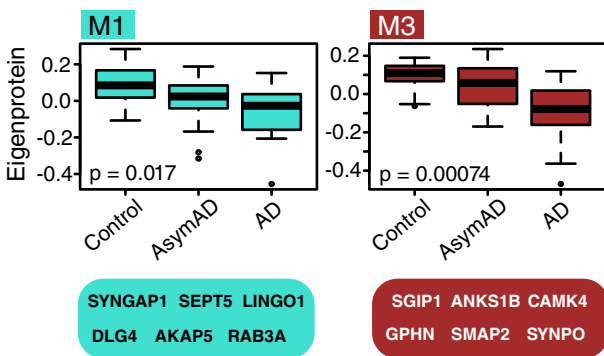

# C 'De Novo' Post-Translational Protein Folding

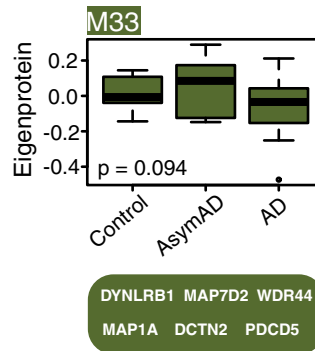

# D Mitochondria

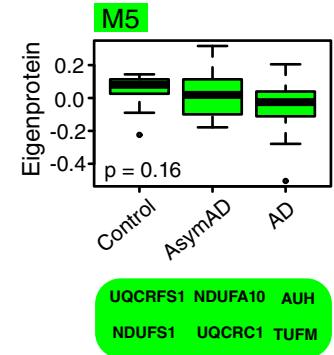

# E Nucleosome

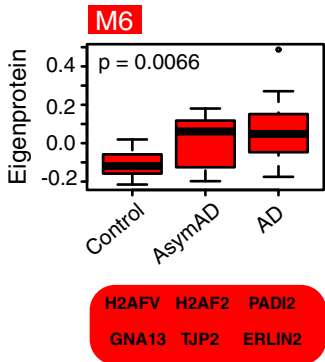

# F RNA Binding, Transport, and Splicing via Spliceosome

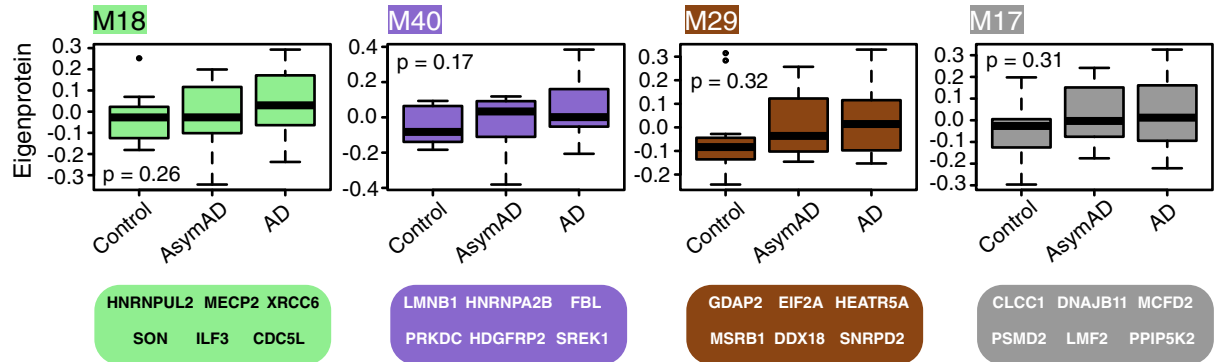

Supplement: MOESM11 [file 16173264]
