# Supplementary material for: Deep proteomic network analysis of Alzheimer’s disease brain reveals alterations in RNA binding proteins and RNA splicing associated with disease
Source: Springer Nature journal article supplement (doi:10.1186/s13024-018-0282-4), 2018-10-04
Supplement: MOESM13 [file 16173264]

Percent Cell Type

Cell Type

CERAD Amyloid Score

Braak Stage

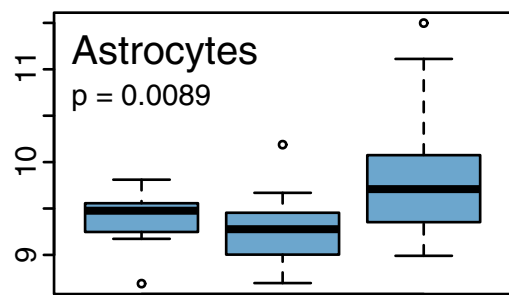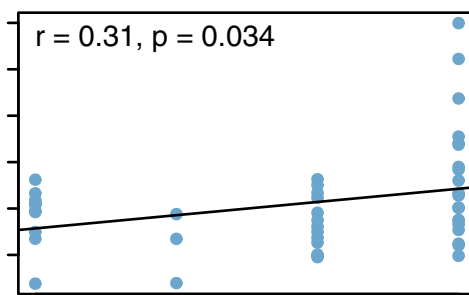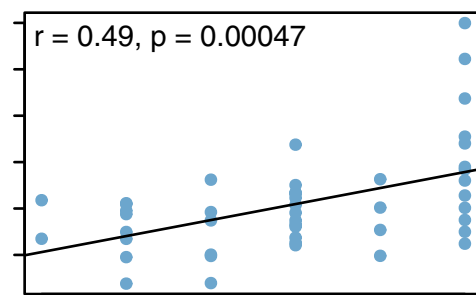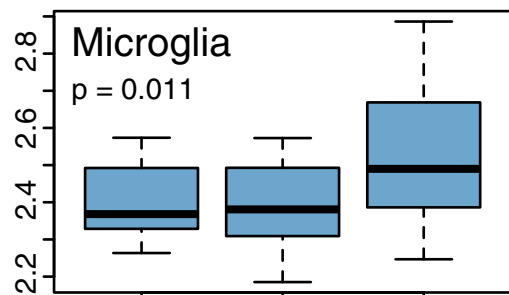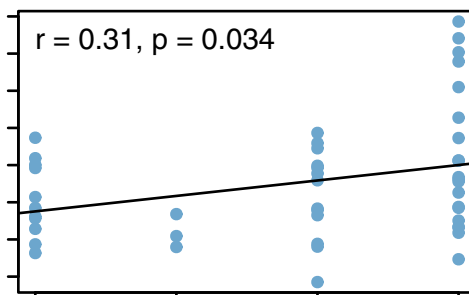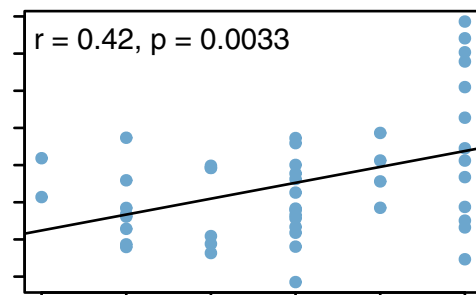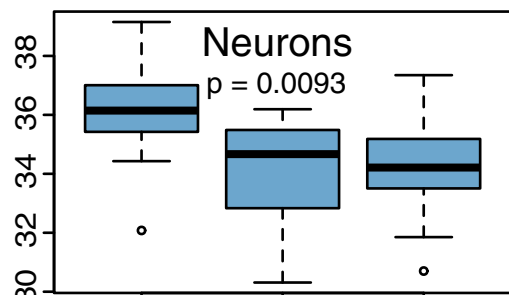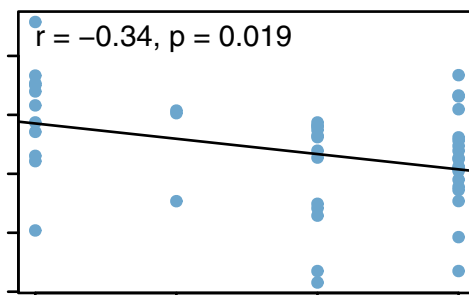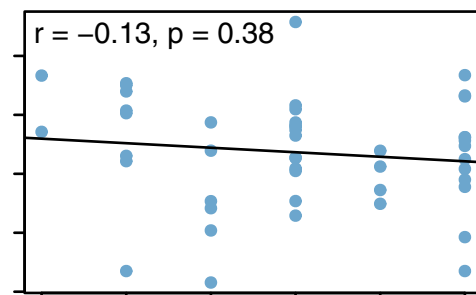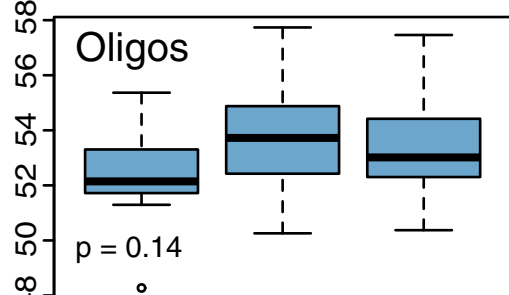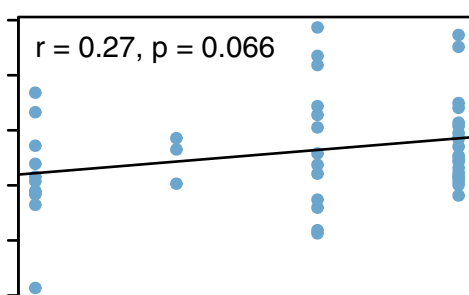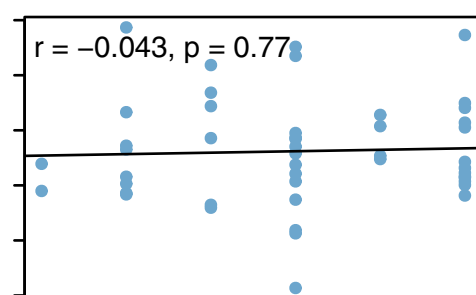

Control AsymAD AD

0 1 2 3

1 2 3 4 5 6
