# Supplementary material for: Deep proteomic network analysis of Alzheimer’s disease brain reveals alterations in RNA binding proteins and RNA splicing associated with disease
Source: Springer Nature journal article supplement (doi:10.1186/s13024-018-0282-4), 2018-10-04

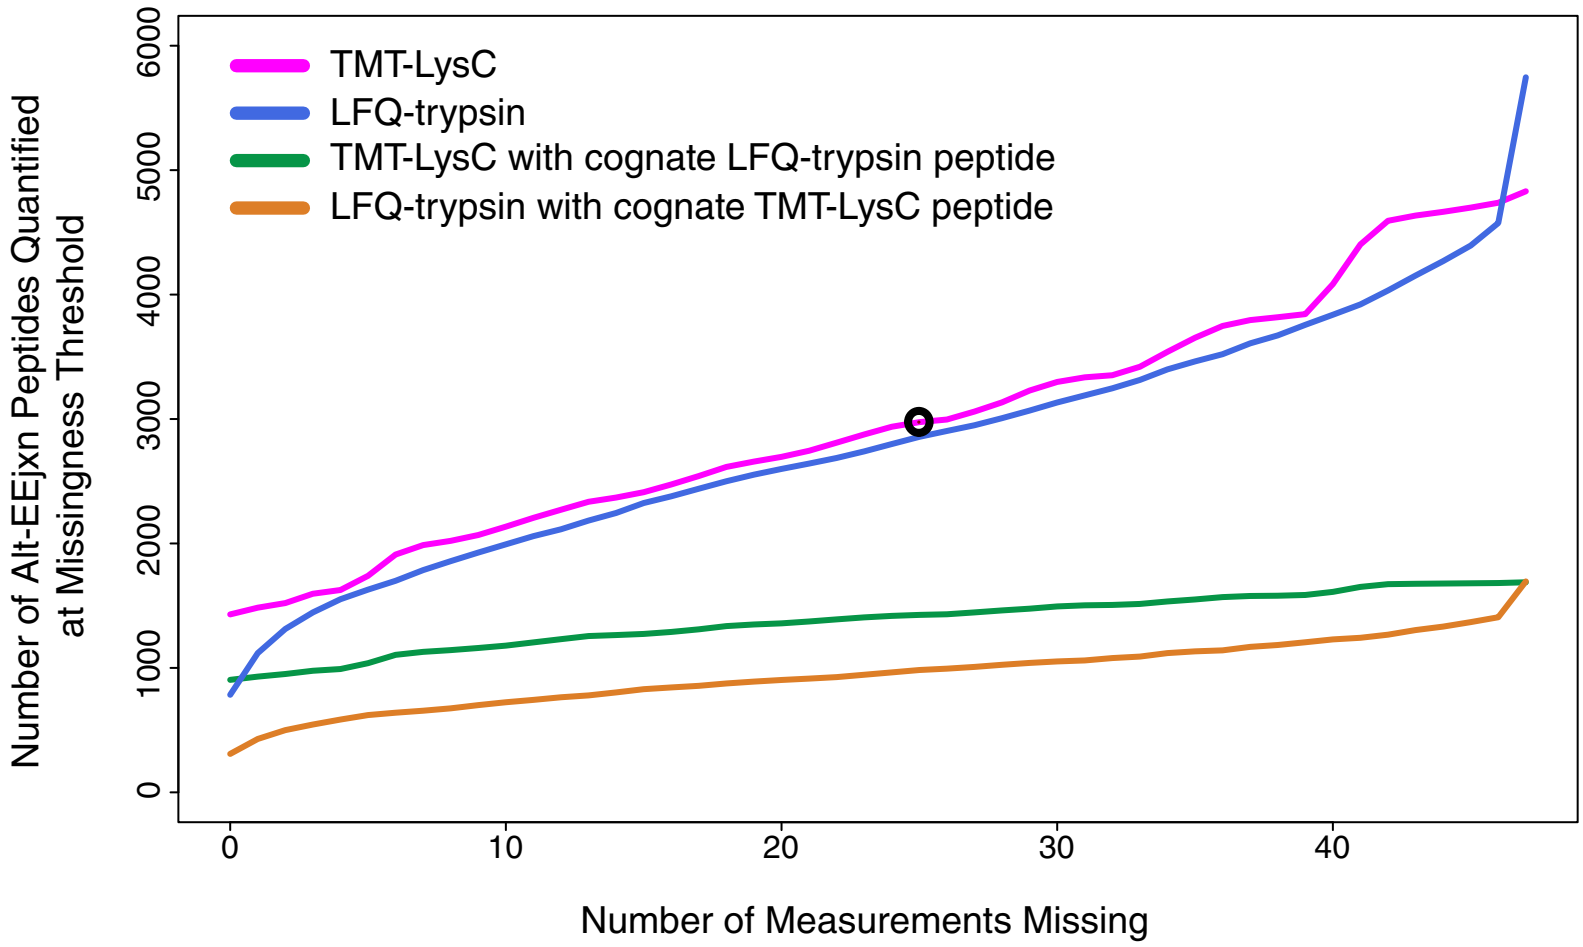

Supplement: MOESM18 [file 16173264]
